# Supplementary material
Source: MDPI journal article supplement (https://www.mdpi.com/2076-3417/9/2/245)
Supplement: s1 [file s1]

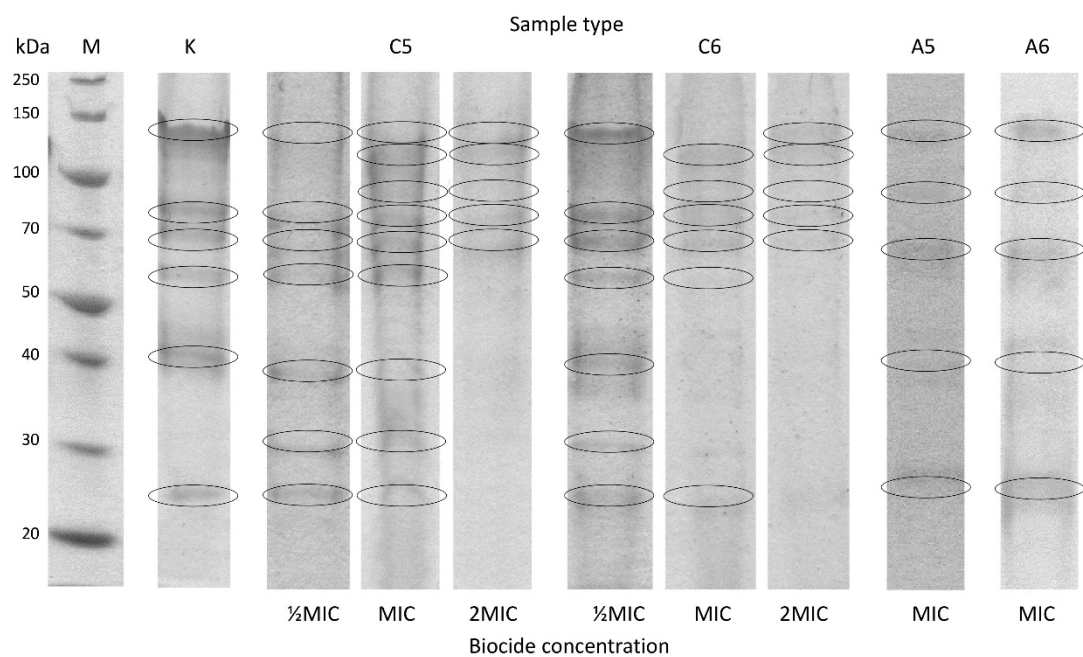

**Figure S1.** SDS-PAGE analysis of extracellular protein profiles of untreated *A. brasiliensis* ATCC 16404 (K – control samples) and treated with neutral (A5 and A6) and cationic (C5 and C6) gemini surfactants. M – molecular weight standard (PageRuler™ Unstained Broad Range Protein Ladder)
